# Supplementary material for: Tsunami damage to ports: Cataloguing damage to create fragility functions from the 2011 Tohoku event
Source: Copernicus journal article supplement (doi:10.5194/nhess-2020-355), 2020-10-28
Supplement: Supplementary file 1 [file nhess-2020-355-supplement.pdf]

# Tsunami damage to ports: Cataloguing damage to create fragility functions from the 2011 Tohoku event

These datasets are provided in courtesy of the Asian School of the Environment, Nanyang Technological University and Earth Observatory of Singapore. You may use the data freely with acknowledgement.

[Last updated: 24<sup>th</sup> October 2020]

## Database description:

The database provides a comprehensive inventory of port structures and their associated damage in the 2011 Great East Japan tsunami. The database is available through an unrestricted data repository (DR-NTU) hosted by Nanyang Technological University (<https://doi.org/10.21979/N9/OTZMT1>). Using the “Tree” view in the data repository, users are able to view subfolders of the database.

The database is stored as an attribute table and is available in the formats of shapefiles (.shp) and spreadsheet (.csv). The attribute table consists of several parameters for each digitised port structure. The structures are delineated in ArcMap 10.5 (Fig. A). A summary of the parameters included in the database is presented in Table A. In the “Shapefile” subfolder, the dataset is separated into their port locations, namely Hachinohe, Kuji, Ishinomaki, Sendai, Soma and Onahama. Each item in the folder is stored as items of a polygon vector layer (.zip), in the Japanese Geodetic Datum 2000 (JGD2000 Transverse Mercator) coordinate system. The data can be viewed and analysed in any Geographic Information Systems (GIS) applications. In the “CSV” subfolder, the dataset is organised in three ways – (i) all data, (ii) according to port locations and (iii) according to industries. Each item in the folder is stored as a comma-separated values (.csv) file and is compatible with Microsoft Excel, R programs and other statistical software.

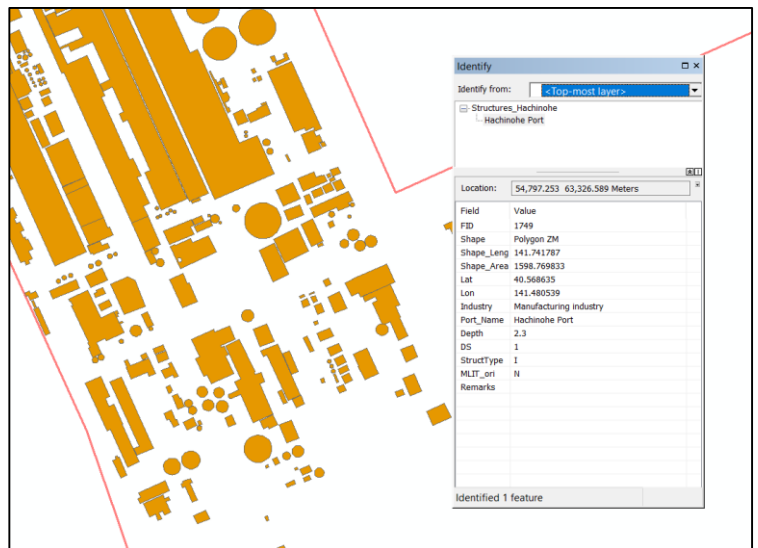

Figure A. Detailed information is recorded for each port structure in ArcMap. An example of port structure outlines in ArcMap.

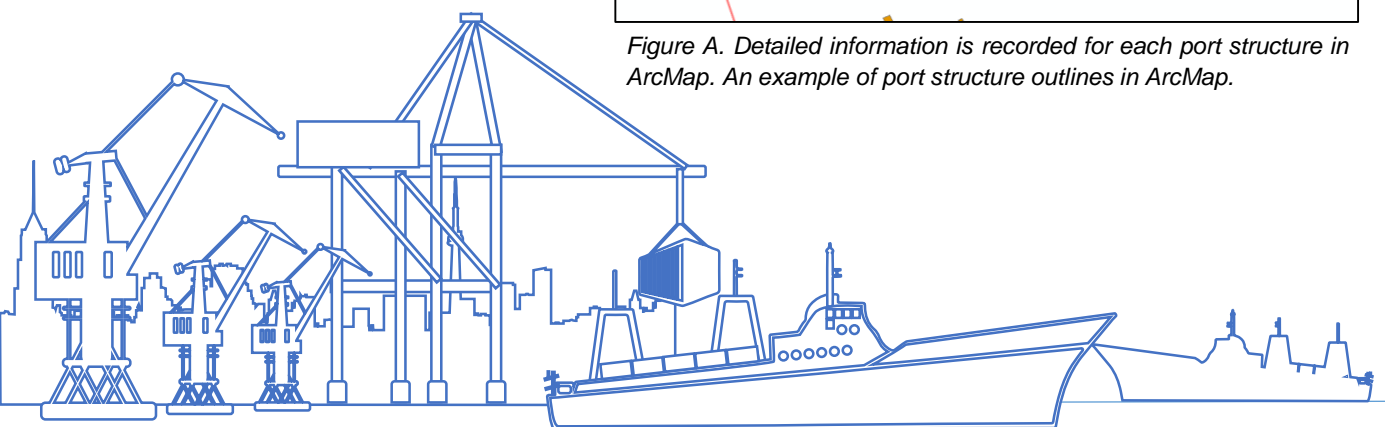

Table A. Summary of parameters found in dataset

| Label      | Parameter                                | Details                                                                                                                                                |
|------------|------------------------------------------|--------------------------------------------------------------------------------------------------------------------------------------------------------|
| Lat        | Latitude                                 | Latitude of port structure (decimal degrees)                                                                                                           |
| Lon        | Longitude                                | Longitude of port structure (decimal degrees)                                                                                                          |
| Industry   | Type of port industry                    | Refer to paper                                                                                                                                         |
| Port_Name  | Name of port                             | Name of port which the structure was found                                                                                                             |
| Depth      | Inundation depth                         | Maximum inundation depth (in metres)                                                                                                                   |
| DS         | Damage state                             | Refer to Table B                                                                                                                                       |
| StructType | Type of port structure                   | “B” refers to Building, “I” refers to Infrastructure                                                                                                   |
| MLIT_ori   | Original MLIT database structure outline | Structure polygon outline originally from MLIT database. “Y” refers to original MLIT outline, “N” refers to structure outline delineated in this work. |
| Remarks    | Remarks                                  |                                                                                                                                                        |

Table B. Damage state description for buildings and non-buildings port infrastructure

| Damage State | Damage Description                                                                                                                                                                                                                                  |                                                                                                                                                                                                                |
|--------------|-----------------------------------------------------------------------------------------------------------------------------------------------------------------------------------------------------------------------------------------------------|----------------------------------------------------------------------------------------------------------------------------------------------------------------------------------------------------------------|
|              | Buildings (B)                                                                                                                                                                                                                                       | Infrastructure (I)                                                                                                                                                                                             |
| DS 0         | <ul style="list-style-type: none"> <li>Little to no water penetration.</li> <li>Non-structural components (windows and door) and roof remain intact.</li> </ul> 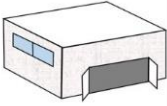 | <ul style="list-style-type: none"> <li>No floodwater impacts on infrastructure.</li> </ul>                                  |
|              | <i>Serviceability:</i> Ready for immediate use                                                                                                                                                                                                      |                                                                                                                                                                                                                |
| DS 1         | <ul style="list-style-type: none"> <li>Water penetration.</li> <li>Non-structural components and roof remain intact.</li> </ul>                                  | <ul style="list-style-type: none"> <li>No visible damage from outside of infrastructure.</li> </ul>                        |
|              | <i>Serviceability:</i> Ready for immediate use but requires interior restoration, such as drying of floors and walls, repainting, repairs to plumbing and electric systems.                                                                         |                                                                                                                                                                                                                |
| DS 2         | <ul style="list-style-type: none"> <li>Non-structural components and/or roof have sustained damage.</li> <li>Structural components are intact.</li> </ul>        | <ul style="list-style-type: none"> <li>Some damage to infrastructure, while foundation or base remains intact.</li> </ul>  |
|              | <i>Serviceability:</i> Obvious repair works in the intermediate period after the tsunami. Operational only after repairs.                                                                                                                           |                                                                                                                                                                                                                |
| DS 3         | <ul style="list-style-type: none"> <li>Structural components (columns and beams) have sustained damage, or rackings have buckled and folded.</li> </ul>          | <ul style="list-style-type: none"> <li>Foundation or base of infrastructure has folded or buckled.</li> </ul>              |
|              | <i>Serviceability:</i> Not repairable. Replacement or removal of building in the intermediate period after the tsunami.                                                                                                                             |                                                                                                                                                                                                                |
| DS 4         | <ul style="list-style-type: none"> <li>Total structural failure.</li> <li>Building has either overturned or slid from original position.</li> </ul>              | <ul style="list-style-type: none"> <li>Infrastructure has overturned or slid from original position.</li> </ul>            |
|              | <i>Serviceability:</i> Not operational.                                                                                                                                                                                                             |                                                                                                                                                                                                                |
